# Supplementary material for: Cultural Churn: Global Variation in the Instability of National Cultures
Source: Research Square preprint supplement (doi:10.21203/rs.3.rs-8233257/v1), 2025-12-12
Supplement: Supplementary file 1 [file c76484d2512588c45c3ffa61.docx]

**Supporting Information for**

Cultural Churn: Global Variation in the Instability of National Cultures

| Sections | |
| --- | --- |
| S1. World Values Survey Variables Used in the Cultural Churn Index………………. | Page 3 |
| S2. Robustness Tests of the Cultural Churn Index…………………………………… | Page 3 |
| S3. Data Quality……………………………………………………………………… | Page 4 |
| S4. Alphabetized Cultural Churn Scores……………………………………………... | Page 6 |
| S5. Preregistered Analyses of the Change/Baseline Value Predictors………………... | Page 6 |
| S6. Additional Methodological Details for the Specification Curve Analyses……….. | Page 7 |
| S7. Additional Results from the Specification Curve Analyses………………………. | Page 9 |
| Figure S1. Linear relationship between the original cultural churn index (145 WVS variables) and the alternate index based on a restricted set of 45 variables…………... | Page 11 |
| Figure S2. Effects of the change value predictors on cultural churn across 2,048 specifications…………………………………………………………………………. | Page 12 |
| Figure S3. Effects of the baseline value predictors on cultural churn across 4,096 specifications…………………………………………………………………………. | Page 13 |
| Table S1. Cultural churn scores for each of 71 countries, listed alphabetically……… | Page 14 |
| Table S2. Between-country effects of changes in the predictors on cultural churn…………………………………………………………………………………... | Page 16 |
| Table S3. Between-country effects of baseline values of the predictors on cultural churn…………………………………………………………………………………... | Page 18 |
| Table S4. Specification Curve Analyses Predicting Cultural Churn from Changes in the Predictor Variables………………………………………………………………... | Page 20 |
| Table S5. Specification Curve Analyses Predicting Cultural Churn from Baseline Values of the Predictor Variables……………………………………………………... | Page 22 |

**S1. World Values Survey Variables Used in the Cultural Churn Index.**

To calculate each score on the cultural churn index, we began with the full set of 145 WVS variables identified by Muthukrishna et al. 1 as culturally transmissible traits. The *allele-dimensions-data.csv* file contains the labels and codes for each of these variables (https://osf.io/r9ugk/overview?view_only=f7c599cc16a04f2cb88574fcbb9ce42e). Each wave consists of a unique subset of these 145 variables, and of that subset, different numbers of variables are present for each country. This makes presenting a complete list of variables present for each observation on the cultural churn index excessively complex. For this reason, we include an R script on the Open Science Framework titled *R script for replication.R* containing the function *identify_common_vars,* which outputs a complete list of included variables for a specified country, separated by time interval (https://osf.io/r9ugk/overview?view_only=f7c599cc16a04f2cb88574fcbb9ce42e). The script comes with annotated instructions on the use on this function.

**S2. Robustness Tests of the Cultural Churn Index**

Given that any two observations on the cultural churn index may be based on different sets of variables, it is possible that differences in scores are driven by differences in the variables included, rather than differences in the underlying construct. Muthukrishna et al. 1 tested the robustness of the Cultural Fixation Index (*CFST*) to missing data and found that after dropping up to 50% of the WVS variables, the resulting scales of cultural distance remained highly correlated with the original indices. This suggests that *CFST* scores should generally be robust to missing data, as cultural values tend to cluster within countries.

We conducted our own robustness tests, by calculating an alternate cultural churn index using only the 45 WVS variables that have been consistently fielded across waves 2 to 7 (see *SOM analyses.R*; https://osf.io/r9ugk/overview?view_only=f7c599cc16a04f2cb88574fcbb9ce42e). This index correlated extremely highly with the original cultural churn index (β = 0.88, *SE* = 0.04, *t*(147) = 22.22, *p* < .001). Figure S1 visualizes the linear relationship between the two indices. We take this as evidence that the full cultural churn index is robust to different variables being included across countries and time intervals.

**S3. Data Quality**

To assess and control for possible differences in survey data quality across countries and waves, we constructed a data quality index using two multi-item blocks from the World Values Survey: the “Importance in Life” items (seven items, available in all waves) and the Schwartz Values items (ten items, available in waves 5 and 6). These scales are especially useful for detecting low-quality responding via longstring analysis because they are among the few multi-item scales in the WVS, and they ask respondents to make comparative judgments about the importance of different values. In particular, the Schwartz theory of personal values emphasizes that many values are inherently in conflict with one another, which makes it highly implausible that identical responses across all items would reflect a genuine response profile.

For each respondent, we calculated two complementary longstring measures of response non-differentiation. The first was a *proportional longstring score*, defined as the maximum number of identical responses in sequence divided by the number of items in the scale. This measure is relatively sensitive, capable of detecting partially non-differentiated response patterns, but also more susceptible to false positives when respondents provide genuinely thoughtful responses that happen to include repeated values. The second was a *full-scale longstring indicator*, a binary measure of whether all items in the scale received the same response. This measure is more conservative, unlikely to misclassify valid responders as careless, but more likely to miss low-quality responders who provided near-uniform answers (e.g., nine identical responses and one slightly different response). Used together, the two measures complement one another, helping to offset each other’s limitations.

We then aggregated these measures to the country × wave level, calculating the mean proportional longstring and the proportion of full-scale longstring cases for both the Importance items and the Schwartz items. This produced four candidate indicators of data quality, with observations at each time interval within each country, which were used to create a composite data quality index.

We began by assessing the reliability of the four candidate indicators: Importance proportional longstring, Importance full-scale longstring, Schwartz proportional longstring, and Schwartz full-scale longstring. A reliability analysis across these four indicators yielded an overall Cronbach’s α of .66. Item-level diagnostics indicated that the Importance proportional longstring indicator was poorly correlated with the other indicators (corrected item-total correlation = .15), and its removal substantially improved internal consistency (α = .77). Based on this, we excluded Importance proportional longstring from the composite index.

With the remaining three indicators, we next conducted a parallel analysis, which recommended a one-factor solution. To further evaluate dimensionality, we estimated both one- and two-factor exploratory factor analyses (EFA). In the one-factor solution, all three indicators loaded strongly on the single latent factor (λ = .64 for Importance full-scale longstring, λ = .96 for Schwartz max longstring, λ = .74 for Schwartz full-scale longstring), accounting for 63% of the variance. For completeness, we also examined a two-factor solution. However, the second factor explained only 2% of the variance, and the loadings indicated that all three items continued to load strongly on the first factor while showing negligible loadings on the second. The first factor accounted for 98% of the explained variance, leaving the second factor trivial and uninterpretable. Together, these results support a unidimensional structure, and the three indicators were standardized and averaged to form a composite data quality index.

As a validity test, we examined whether the composite data quality index was associated with indicators of socioeconomic development and with our cultural churn scores. We estimated multilevel models with random intercepts for countries and time intervals, decomposing predictors into between-country (country means) and within-country (mean-centered deviations) components. Consistent with the expectation that survey quality is higher in more economically developed countries, the results showed a significant positive association at the between-country level (γ = 0.37, *p* < .001), indicating that countries with higher GDP per capita also tended to show higher survey quality. By contrast, there was no evidence of a meaningful relationship between data quality and cultural churn scores (γ = -0.06, *p* = .61 for country-mean data quality; γ = -0.07, *p* = .23 for within-country deviations). These results support the validity of the index by showing it tracks expected cross-national differences in development, while also indicating that our measure of cultural churn is not confounded with survey quality.

**S4. Alphabetized Cultural Churn Scores**

Table S1 contains the cultural churn scores for each of 71 countries, listed alphabetically.

**S5. Preregistered Analyses of the Change/Baseline Value Predictors**

The analyses reported in the main article contain several deviations from the preregistered analysis plan. First, after visual inspection of the predictor variables showed consistent instances of outlying data points, we implemented robust multilevel models to reduce the impact of these outliers on the model estimates 2, whereas our preregistered analyses specify the use of standard multilevel models. Second, having implemented robust multilevel models, we discovered the robust multilevel modelling function *rlmer* 2 frequently failed to converge on estimates when random slopes across countries were included in the model. After observing that the standard multilevel model results were not sensitive to the inclusion of random slopes across countries (in cases where the models did converge), we deviated from the preregistered model specifications and ran random-intercept models for all analyses reported in the main text. Third, the models reported in the main article include random intercepts across countries and timespans, whereas the preregistered analyses only specified random intercepts across countries.

Tables S2 and S3 report the between country effects for all predictors when following the exact model specifications detailed in the preregistration. All models include the between- and within-country effect for the relevant predictor, controlling for the length of time between waves (country-mean and country-mean-centered), with random slopes and intercepts across countries. The results closely resemble those reported in Tables 2 and 4 of the main article, with some deviations in cases where the predictor data contained outliers.

**S6. Additional Methodological Details for the Specification Curve Analyses**

Specification curve analysis (SCA; 3) tests whether a result generalizes across many different analytic decisions, providing a meta-analytic depiction of each predictor’s effects. This approach is particularly useful here because our dataset presents several inferential challenges. One challenge pertains to statistical power, which is limited by the number of countries in the dataset (*n* = 71). This modest sample size, coupled with the large number of potential predictors, creates a “large p, small n” problem 4 that limits power to detect meaningful effects. Additionally, mean cultural churn calculated across one time interval (Wave 2–3) was higher than mean churn across any other time interval, and 10 countries in the sample only had data for that time interval—thus risking overstating the degree of churn in these countries due to artefacts of missing data. Although there are a variety of analytic approaches that might address each of these issues, any single analytic decision has the potential to produce results that are idiosyncratic to that choice. SCA mitigates this risk by evaluating effects across all reasonable combinations of analytic decisions, yielding a robust summary of each predictor’s influence.

We conducted two separate SCAs. The first SCA tested the change values of the predictors, and the second SCA tested the baseline values of the predictors. In each case, the first step was to reduce the predictor set to a more manageable and non-redundant subset of variables. To do this, we applied the following principles: (a) variables were included only if their univariate effects were statistically significant (p < .05; see Tables 2 and 3); and (b) when both a composite index and one or more of its subindices met that criterion, we included either the composite index or those subindices (depending on whether the univariate effect of the composite index exceeded those of the subindices) but not both.

For the change values of the predictors, this process reduced the original 22 predictors to 9 non-redundant predictors, and produced a total of 512 separate model specifications per predictor variable. For each predictor, we then estimated the between-country effect while statistically controlling for all possible combinations of the other predictors in the reduced set. All models in the SCA also included controls for years between waves and data quality (entered as both country-mean and country-mean-centered variables). This produced 512 separate model specifications per predictor variable. The baseline-value SCA followed an analogous procedure, beginning with 12 non-redundant predictors and producing 4,096 separate model specifications per predictor. In both SCAs, we ran analyses on the full dataset as well as on a truncated dataset that excluded observations from the Wave 2–3 time interval (see section S7 for results from the truncated dataset).

To summarize the results of each SCA, we calculated three descriptive statistics for each predictor: (a) the percentage of model specifications yielding standardized effect sizes (γ) greater than |.10|, (b) the median effect size γ, and (c) the range of effect sizes observed across all specifications. Following standard practice in interpreting SCA results 5–7, our primary criterion for identifying robust predictors was that at least 80% of model specifications yielded effect sizes greater than |.10|.

**S7. Additional Results from the Specification Curve Analyses**

The following figures and plots provide additional information on the specification curve analyses reported in the main article. Figures S2 and S3 visualize the results of the specification curve analyses, with the effects for each predictor across all specifications plotted from negative to positive. Relatively flat curves indicate robust and consistent effects (e.g., changes in GDP per capita), while steeper curves indicate effects that are highly sensitive to the inclusion of certain covariates (e.g., changes in interpersonal globalization).

Tables S4 and S5 report the results from Tables 3 and 5 of the main article, while also presenting four additional pieces of information: 1) The percentage of effect sizes above |.20|, 2) The percentage of effect sizes above/below 0 (above 0 for predictors with positive median effects and below 0 for predictors with negative median effects), 3) the percentage of statistically significant effects (*p* < .05), and 4) results separated by different exclusion criteria. The first two are presented in the interest of transparency, as the % > |.10| threshold reported in the main article is a somewhat arbitrary setting, and the percentage of significant effects is presented as complement to the main article’s focus on effect size over statistical significance.

The results also contain the full set of model specifications, as well as results from this full set separated by whether or not data from the first wave interval were included. In a small minority of cases, this exclusion had a substantial effect on the results. For example, baseline levels of GDP per capita showed effect sizes greater than |.10| across 86.72% of model specifications when the first wave interval was included, whereas this percentage fell to 32.62% when the wave interval 1 observations were excluded. This highlights the value of our approach, as each of these analytic decisions (i.e., including vs excluding the wave interval 1 data) on their own provides an incomplete and potentially misleading picture of the results, whereas the results from the full set of specifications provides a more comprehensive meta-analytic picture of the results.

**
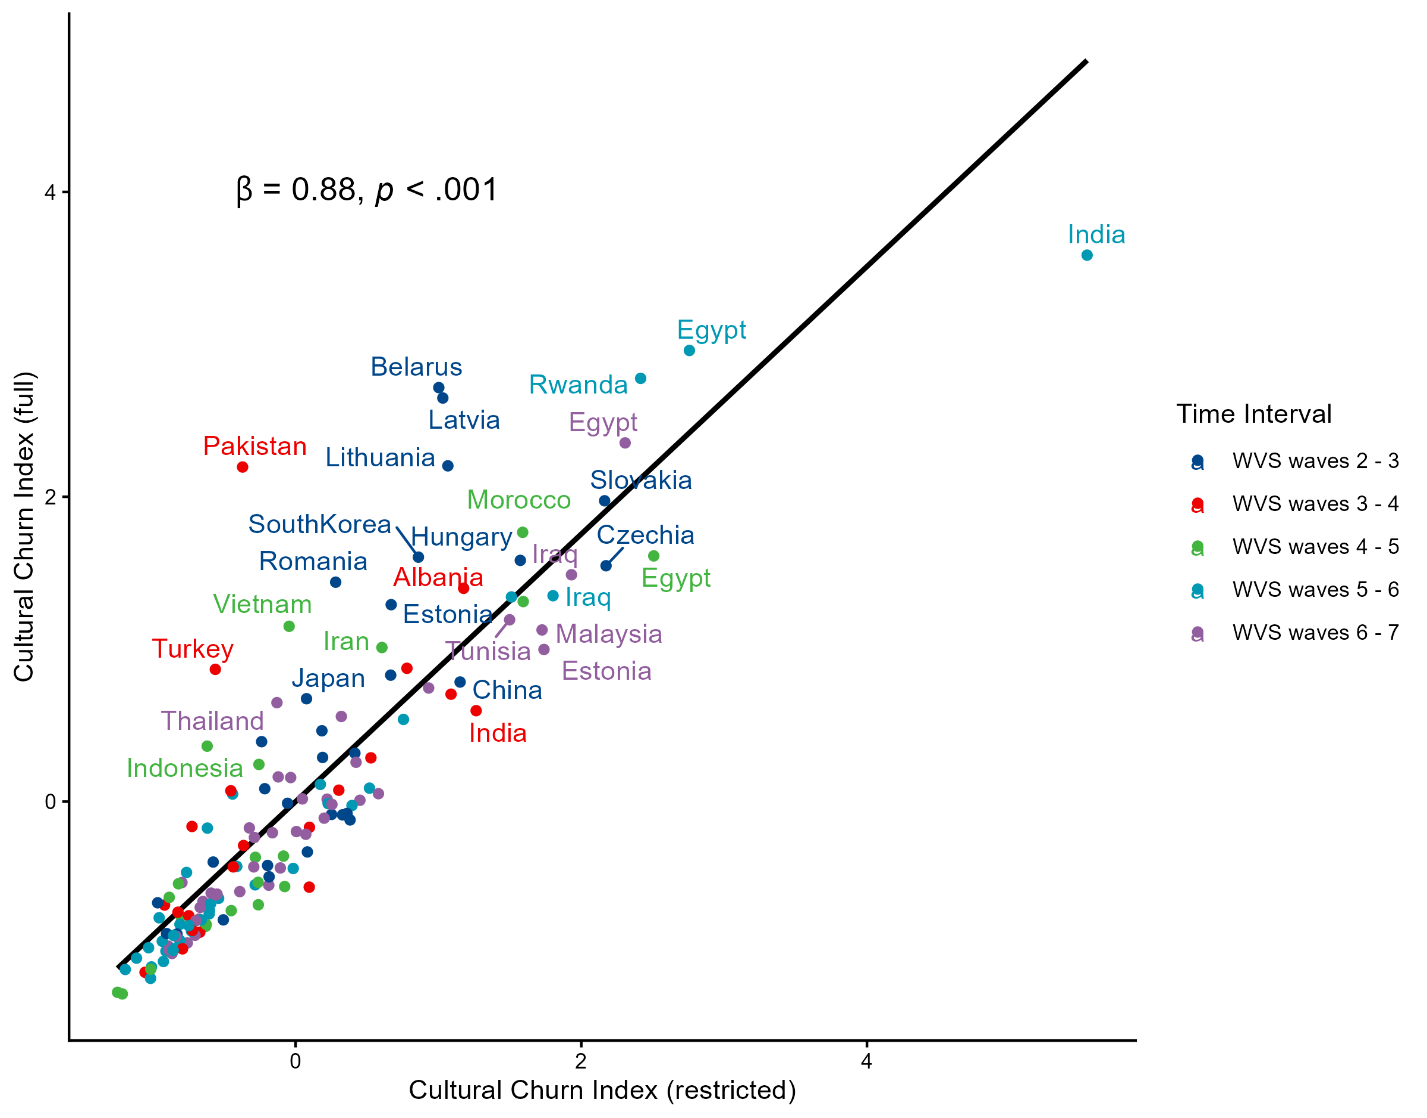
**

**Figure S1.** Linear relationship between the original cultural churn index (145 WVS variables) and the alternate index based on a restricted set of 45 variables.


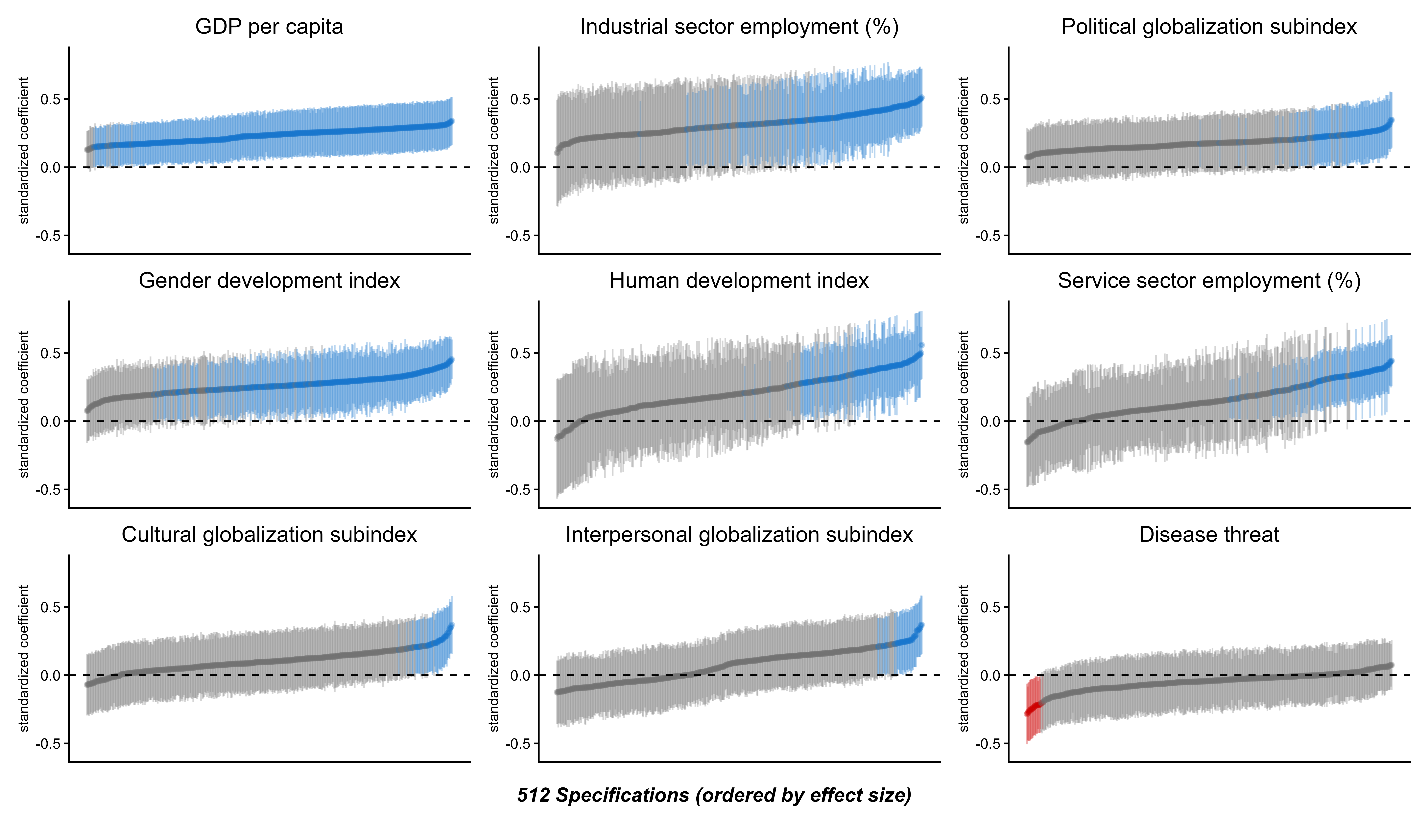


**Figure S2.** Effects of the change value predictors on the cultural churn across 512 specifications. Effects are reported as standardized between-country effect sizes. Error bars represent 95% confidence intervals. Positive significant effects (p < .05) are colored in blue, negative significant effects (p < .05) are colored in red, and nonsignificant effects (p ≥ .05) are colored in gray.


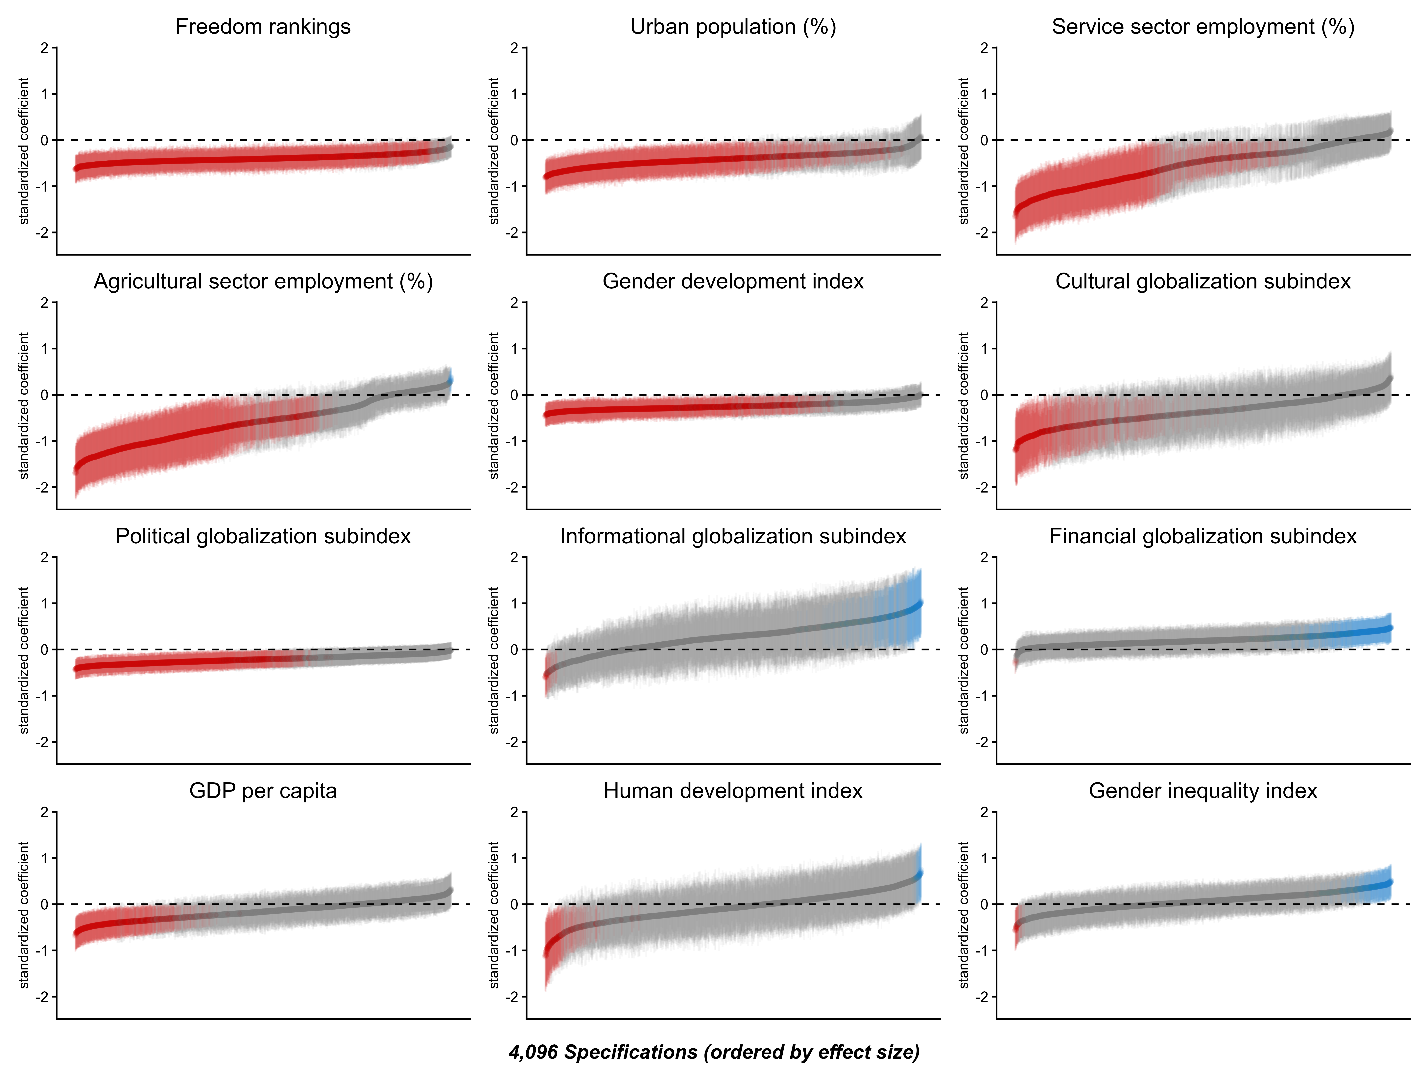


**Figure S3.** Effects of the baseline value predictors on the speed of cultural churn across 4,096 specifications. Effects are reported as standardized between-country effect sizes. Error bars represent 95% confidence intervals. Positive significant effects (p < .05) are colored in blue, negative significant effects (p < .05) are colored in red, and nonsignificant effects (p ≥ .05) are colored in gray.

| **Table S1.** *Cultural churn scores for each of 71 countries, listed alphabetically.* | | | | | | |
| --- | --- | --- | --- | --- | --- | --- |
| Country | Wave 2 - 3 | Wave 3 - 4 | Wave 4 - 5 | Wave 5 - 6 | Wave 6 - 7 | Mean score | |
| Albania | — | .057 | — | — | — | .057 | |
| Argentina | .013 | .006 | .012 | .018 | .010 | .012 | |
| Australia | — | — | — | .006 | .010 | .008 | |
| Azerbaijan | — | — | — | — | .040 | .040 | |
| Bangladesh | — | .046 | — | — | — | .046 | |
| Belarus | .083 | — | — | — | .025 | .054 | |
| Brazil | .027 | — | — | .008 | .009 | .015 | |
| Bulgaria | .045 | — | — | — | — | .045 | |
| Canada | — | — | .004 | — | — | .004 | |
| Chile | .022 | .012 | .014 | .014 | .029 | .018 | |
| China | .044 | .043 | .021 | .030 | .016 | .031 | |
| Colombia | — | — | — | .020 | .017 | .019 | |
| Cyprus | — | — | — | .009 | .020 | .015 | |
| Czechia | .060 | — | — | — | — | .060 | |
| Ecuador | — | — | — | — | .025 | .025 | |
| Egypt | — | — | .061 | .088 | .076 | .075 | |
| Estonia | .054 | — | — | — | .049 | .052 | |
| Finland | .027 | — | — | — | — | .027 | |
| Georgia | — | — | — | .013 | .029 | .021 | |
| Germany | .035 | — | — | .010 | .029 | .025 | |
| Ghana | — | — | — | .015 | — | .015 | |
| Hong Kong | — | — | — | — | .018 | .018 | |
| Hungary | .060 | — | — | — | — | .060 | |
| India | .034 | .041 | .015 | .100 | — | .048 | |
| Indonesia | — | — | .036 | — | — | .036 | |
| Iran | — | — | .049 | — | — | .049 | |
| Iraq | — | — | — | .056 | .058 | .057 | |
| Japan | .042 | .025 | .004 | .011 | — | .020 | |
| Jordan | — | — | .018 | .030 | .017 | .022 | |
| Kazakhstan | — | — | — | — | .032 | .032 | |
| Latvia | .081 | — | — | — | — | .081 | |
| Lebanon | — | — | — | — | .034 | .034 | |
| Libya | — | — | — | — | .020 | .020 | |
| Lithuania | .073 | — | — | — | — | .073 | |
| Malaysia | — | — | — | .028 | .051 | .040 | |
| Mexico | .026 | .034 | .013 | .007 | .013 | .019 | |
| Moldova | — | .023 | .034 | — | — | .028 | |
| Morocco | — | — | .064 | .028 | — | .046 | |
| Netherlands | — | — | — | .016 | — | .016 | |
| New Zealand | — | — | — | .007 | — | .007 | |
| Nigeria | .021 | .015 | — | — | .017 | .018 | |
| Norway | .011 | — | — | — | — | .011 | |
| Pakistan | — | .072 | — | — | .024 | .048 | |
| Peru | — | .018 | .018 | .020 | .011 | .017 | |
| Philippines | — | .014 | — | — | .011 | .012 | |
| Poland | .038 | — | — | .010 | .030 | .026 | |
| Puerto Rico | — | .020 | — | — | — | .020 | |
| Romania | .057 | — | — | .015 | .009 | .027 | |
| Russia | .030 | — | — | .025 | .032 | .029 | |
| Rwanda | — | — | — | .084 | — | .084 | |
| Serbia | — | .025 | .055 | — | — | .040 | |
| Singapore | — | — | — | — | .024 | .024 | |
| Slovakia | .068 | — | — | — | — | .068 | |
| Slovenia | — | — | — | .012 | .027 | .019 | |
| South Africa | .019 | .010 | .007 | .039 | — | .019 | |
| South Korea | .061 | .030 | .016 | .019 | .028 | .031 | |
| Spain | .012 | .014 | .014 | .014 | .044 | .019 | |
| Sweden | .037 | — | — | .011 | .018 | .022 | |
| Switzerland | .020 | — | — | — | — | .020 | |
| Taiwan | — | — | — | .013 | .013 | .013 | |
| Thailand | — | — | — | .055 | .042 | .049 | |
| Trinidad & Tobago | — | — | — | .009 | — | .009 | |
| Tunisia | — | — | — | — | .052 | .052 | |
| Turkey | .029 | .046 | .022 | .010 | .017 | .024 | |
| Ukraine | — | — | — | .031 | — | .031 | |
| United Kingdom | .027 | — | — | — | — | .027 | |
| United States | .016 | .012 | .018 | .008 | .015 | .014 | |
| Uruguay | — | — | — | .013 | — | .013 | |
| Venezuela | — | .030 | — | — | — | .030 | |
| Vietnam | — | — | .052 | — | — | .052 | |
| Zimbabwe | — | — | — | — | .025 | .025 | |

**Table S2.** *Between-country effects of changes in the predictors on cultural churn.*

| Predictor (change values) | γ (*SE*) | 95% CI | *t* (*df*) | *p* |
| --- | --- | --- | --- | --- |
| Human development index | 0.46 (0.09) | [0.28, 0.64] | 5.08 (62.14) | <.001 |
| Gross national income  per capita | 0.25 (0.08) | [0.10, 0.41] | 3.17 (44.10) | .003 |
| Education | 0.39 (0.09) | [0.22, 0.56] | 4.47 (54.54) | <.001 |
| Life expectancy | 0.34 (0.11) | [0.13, 0.55] | 3.15 (77.10) | .002 |
| Gender development index | 0.39 (0.08) | [0.24, 0.55] | 4.92 (58.65) | <.001 |
| Gender inequality index | 0.12 (0.11) | [-0.10, 0.35] | 1.07 (63.74) | .288 |
| GDP per capita | 0.39 (0.10) | [0.20, 0.58] | 3.98 (101.48) | <.001 |
| Service sector  employment (%) | 0.40 (0.09) | [0.22, 0.58] | 4.42 (69.67) | <.001 |
| Industrial sector employment (%) | 0.45 (0.11) | [0.24, 0.66] | 4.29 (84.95) | <.001 |
| Agricultural sector employment (%) | -0.11 (0.11) | [-0.33, 0.11] | -0.97 (72.18) | .333 |
| Urban population (%) | 0.18 (0.12) | [-0.05, 0.42] | 1.51 (66.42) | .136 |
| Freedom rankings | -0.03 (0.10) | [-0.24, 0.17] | -0.32 (58.19) | .749 |
| Globalization index | 0.26 (0.10) | [0.06, 0.47] | 2.53 (68.15) | .014 |
| Financial  globalization subindex | 0.01 (0.12) | [-0.22, 0.24] | 0.10 (56.62) | .925 |
| Trade  globalization subindex | 0.07 (0.12) | [-0.16, 0.30] | 0.30 (57.11) | .545 |
| Cultural  globalization subindex | 0.38 (0.10) | [0.18, 0.58] | 3.75 (51.65) | <.001 |
| Interpersonal  globalization subindex | 0.31 (0.12) | [0.09, 0.54] | 2.69 (60.48) | .009 |
| Informational  globalization subindex | 0.15 (0.12) | [-0.09, 0.39] | 1.25 (55.77) | .216 |
| Political  globalization subindex | 0.28 (0.10) | [0.08, 0.47] | 2.80 (65.59) | .007 |
| Disease threat | -0.25 (0.10) | [-0.45, -0.05] | -2.42 (47.67) | .019 |
| Extrinsic mortality | -0.24 (0.12) | [-0.47, 0.00] | -1.96 (33.57) | .058 |
| Population density | 0.02 (0.10) | [-0.17, 0.21] | 0.20 (58.30) | .845 |

*Note.* Each row provides between-country effects from separate random-intercept, random-slope multilevel models. All models control for the within-country effect of each predictor (country-mean centered) and the years between WVS waves (both country-mean and country-mean-centered). All coefficients are standardized. Freedom rankings and the globalization indices were measured using raw change scores, rather than percent changes, as these were the only variables not measured on a ratio scale.

**Table S3.** *Between-country effects of baseline values of the predictors on cultural churn.*

| Predictor (baseline values) | γ (*SE*) | 95% CI | *t* (*df*) | *p* |
| --- | --- | --- | --- | --- |
| Human development index | -0.39 (0.10) | [-0.58, -0.19] | -3.86 (60.97) | <.001 |
| Gross national income  per capita | -0.35 (0.11) | [-0.56, -0.13] | -3.17 (62.62) | .002 |
| Education | -0.30 (0.10) | [-0.50, -0.10] | -2.96 (58.18) | .004 |
| Life expectancy | -0.28 (0.11) | [-0.49, -0.07] | -2.63 (60.93) | .011 |
| Gender development index | -0.32 (0.10) | [-0.51, -0.13] | -3.26 (54.19) | .002 |
| Gender inequality index | 0.26 (0.11) | [0.04, 0.48] | 2.35 (54.13) | .022 |
| GDP per capita | -0.35 (0.10) | [-0.53, -0.16] | -3.65 (65.13) | .001 |
| Service sector  employment (%) | -0.44 (0.09) | [-0.62, -0.26] | -4.86 (65.16) | <.001 |
| Industrial sector employment (%) | 0.14 (0.11) | [-0.08, 0.36] | 1.22 (72.44) | .226 |
| Agricultural sector employment (%) | 0.32 (0.10) | [0.13, 0.52] | 3.20 (66.03) | .002 |
| Urban population (%) | -0.42 (0.10) | [-0.61, -0.23] | -4.24 (53.55) | <.001 |
| Freedom rankings | -0.41 (0.08) | [-0.56, -0.26] | -5.28 (57.17) | <.001 |
| Globalization index | -0.38 (0.11) | [-0.60, -0.16] | -3.43 (65.45) | .001 |
| Financial  globalization subindex | -0.28 (0.10) | [-0.48, -0.08] | -2.75 (59.47) | .008 |
| Trade  globalization subindex | 0.11 (0.12) | [-0.13, 0.35] | 0.90 (58.28) | .374 |
| Cultural  globalization subindex | -0.36 (0.11) | [-0.57, -0.15] | -3.38 (57.82) | .001 |
| Interpersonal  globalization subindex | -0.19 (0.12) | [-0.43, 0.05] | -1.55 (54.54) | .127 |
| Informational  globalization subindex | -0.37 (0.11) | [-0.58, -0.15] | -3.34 (60.17) | .001 |
| Political  globalization subindex | -0.42 (0.09) | [-0.61, -0.24] | -4.61 (60.50) | <.001 |
| Disease threat | 0.03 (0.11) | [-0.19, 0.25] | 0.28 (60.80) | .779 |
| Extrinsic mortality | -0.12 (0.13) | [-0.37, 0.14] | -0.90 (31.80) | .373 |
| Population density | 0.23 (0.08) | [0.08, 0.37] | 2.95 (68.70) | .004 |

*Note.* Each row provides between-country effects from separate random-intercept, random-slope multilevel models. All models control for the within-country effect of each predictor (country-mean centered) and the years between WVS waves (both country-mean and country-mean-centered). All coefficients are standardized. Freedom rankings and the globalization indices were measured using raw change scores, rather than percent changes, as these were the only variables not measured on a ratio scale.

**Table S4.** *Specification Curve Analyses Predicting the Speed of Cultural Churn from Changes in the Predictor Variables.*

| Predictor (change values) | γ > |.20| (%) | γ > |.10| (%) | γ > 0 (%) a | Median γ | Range | *p* < .05 (%) |
| --- | --- | --- | --- | --- | --- | --- |
|  |  | All Specifications b | | | |  |
| Industrial sector employment (%) | 94.34 | 100 | 100 | 0.31 | 0.1 - 0.51 | 46.09 |
| GDP per capita | 65.23 | 100 | 100 | 0.24 | 0.13 - 0.34 | 96.29 |
| Gender Development Index | 80.27 | 99.02 | 100 | 0.26 | 0.08 - 0.45 | 65.62 |
| Political globalization subindex | 29.1 | 96.48 | 100 | 0.18 | 0.07 - 0.35 | 24.61 |
| Human Development Index | 50.59 | 78.32 | 93.55 | 0.2 | -0.13 - 0.56 | 30.47 |
| Service sector employment (%) | 35.35 | 62.5 | 86.91 | 0.14 | -0.15 - 0.44 | 24.8 |
| Cultural globalization subindex | 11.52 | 49.61 | 90.82 | 0.1 | -0.07 - 0.37 | 9.77 |
| Interpersonal globalization subindex | 14.45 | 48.63 | 64.84 | 0.1 | -0.13 - 0.37 | 9.38 |
| Disease threat | 4.49 | 19.34 | 79.88 | -0.04 | -0.28 - 0.08 | 4.1 |
|  |  | Time Intervals 1-5 c | | | |  |
| Industrial sector employment (%) | 90.23 | 100 | 100 | 0.29 | 0.1 - 0.51 | 34.77 |
| GDP per capita | 100 | 100 | 100 | 0.27 | 0.21 - 0.34 | 100 |
| Political globalization subindex | 55.47 | 98.83 | 100 | 0.21 | 0.1 - 0.35 | 45.7 |
| Gender Development Index | 66.41 | 98.05 | 100 | 0.23 | 0.08 - 0.42 | 44.92 |
| Interpersonal globalization subindex | 28.91 | 92.19 | 100 | 0.16 | 0.06 - 0.37 | 18.75 |
| Service sector employment (%) | 51.56 | 89.45 | 100 | 0.2 | 0 - 0.44 | 28.12 |
| Human Development Index | 42.58 | 67.19 | 87.11 | 0.17 | -0.13 - 0.5 | 21.48 |
| Cultural globalization subindex | 17.19 | 64.06 | 96.09 | 0.13 | -0.05 - 0.37 | 14.45 |
| Disease threat | 1.56 | 14.84 | 78.91 | -0.04 | -0.24 - 0.06 | 0.78 |
|  |  | Time Intervals 2-5 d | | | |  |
| Industrial sector employment (%) | 98.44 | 100 | 100 | 0.32 | 0.18 - 0.5 | 57.42 |
| Gender Development Index | 94.14 | 100 | 100 | 0.28 | 0.17 - 0.45 | 86.33 |
| GDP per capita | 30.47 | 100 | 100 | 0.19 | 0.13 - 0.28 | 92.58 |
| Political globalization subindex | 2.73 | 94.14 | 100 | 0.14 | 0.07 - 0.21 | 3.52 |
| Human Development Index | 58.59 | 89.45 | 100 | 0.23 | 0.04 - 0.56 | 39.45 |
| Service sector employment (%) | 19.14 | 35.55 | 73.83 | 0.07 | -0.15 - 0.37 | 21.48 |
| Cultural globalization subindex | 5.86 | 35.16 | 85.55 | 0.07 | -0.07 - 0.31 | 5.08 |
| Disease threat | 7.42 | 23.83 | 80.86 | -0.04 | -0.28 - 0.08 | 7.42 |
| Interpersonal globalization subindex | 0 | 8.59 | 70.31 | -0.04 | -0.13 - 0.17 | 0 |

*Note.* All models included random intercepts across country and time interval, and controlled for between- and within-country differences in the years between WVS waves as well as data quality. The gamma symbol (γ) denotes the standardized between-country effects.

a The percentage of effect sizes above 0 for predictors with positive median effects, and the percentage below 0 for predictors with negative median effects.

b Complete SCA results, combining data with the wave interval 1 observations both included and excluded.

c SCA results with the wave interval 1 observations included.

d SCA results with the wave interval 1 observations excluded.

**Table S5.** *Specification Curve Analyses Predicting the Speed of Cultural Churn from Baseline Values of the Predictor Variables.*

| Predictor (baseline values) | γ > |.20| (%) | γ > |.10| (%) | γ > 0 (%) a | Median γ | Range | *p* < .05 (%) |
| --- | --- | --- | --- | --- | --- | --- |
|  |  | All Specifications b | | | |  |
| Freedom rankings | 98.1 | 100 | 100 | -0.41 | -0.64 - -0.13 | 93.12 |
| Urban population (%) | 93.31 | 97.51 | 99.24 | -0.4 | -0.82 - 0.09 | 71.36 |
| Gender Development Index | 71.97 | 94.07 | 99.8 | -0.25 | -0.46 - 0.01 | 64.65 |
| Political globalization subindex | 56.05 | 89.33 | 100 | -0.21 | -0.44 - -0.01 | 56.4 |
| Service sector employment (%) | 77.98 | 83.25 | 89.58 | -0.45 | -1.67 - 0.22 | 52.42 |
| Cultural globalization subindex | 70.61 | 81.23 | 87.87 | -0.38 | -1.21 - 0.43 | 22.27 |
| Financial globalization subindex | 45.36 | 80.22 | 97.83 | 0.19 | -0.31 - 0.48 | 20.68 |
| Agricultural sector employment (%) | 76.66 | 79.3 | 83.84 | -0.57 | -1.7 - 0.39 | 57.67 |
| Informational globalization subindex | 60.69 | 69.34 | 78.44 | 0.28 | -0.61 - 1.06 | 11.62 |
| GDP per capita | 44.17 | 59.67 | 75.73 | -0.16 | -0.69 - 0.33 | 25 |
| Human Development Index | 35.47 | 47.31 | 58.94 | -0.08 | -1.13 - 0.74 | 8.79 |
| Gender Inequality Index | 23.54 | 42.77 | 61.82 | 0.06 | -0.57 - 0.51 | 10.62 |
|  |  | Time Intervals 1-5 c | | | |  |
| Freedom rankings | 96.19 | 100 | 100 | -0.37 | -0.64 - -0.13 | 87.55 |
| Political globalization subindex | 87.35 | 99.51 | 100 | -0.28 | -0.44 - -0.08 | 87.16 |
| Urban population (%) | 87.99 | 95.02 | 98.49 | -0.39 | -0.82 - 0.09 | 65.04 |
| Service sector employment (%) | 83.89 | 89.75 | 96.29 | -0.55 | -1.67 - 0.22 | 63.82 |
| Financial globalization subindex | 56.1 | 88.92 | 98.49 | 0.22 | -0.29 - 0.48 | 26.86 |
| Gender Development Index | 51.56 | 88.13 | 99.61 | -0.2 | -0.43 - 0.01 | 44.43 |
| GDP per capita | 73.73 | 86.72 | 92.38 | -0.3 | -0.69 - 0.2 | 49.61 |
| Agricultural sector employment (%) | 79.49 | 83.25 | 88.38 | -0.69 | -1.7 - 0.39 | 70.7 |
| Cultural globalization subindex | 67.77 | 78.66 | 84.77 | -0.36 | -1.21 - 0.43 | 20.17 |
| Informational globalization subindex | 68.02 | 75.98 | 85.45 | 0.37 | -0.54 - 1.06 | 18.07 |
| Human Development Index | 47.07 | 57.81 | 68.02 | -0.16 | -1.13 - 0.68 | 13.04 |
| Gender Inequality Index | 23.05 | 40.43 | 57.47 | 0.04 | -0.57 - 0.46 | 12.11 |
|  |  | Time Intervals 2-5 d | | | |  |
| Freedom rankings | 100 | 100 | 100 | -0.43 | -0.6 - -0.22 | 98.68 |
| Urban population (%) | 98.63 | 100 | 100 | -0.41 | -0.75 - -0.16 | 77.69 |
| Gender Development Index | 92.38 | 100 | 100 | -0.28 | -0.46 - -0.11 | 84.86 |
| Cultural globalization subindex | 73.44 | 83.79 | 90.97 | -0.39 | -1.05 - 0.24 | 24.37 |
| Political globalization subindex | 24.76 | 79.15 | 100 | -0.15 | -0.34 - -0.01 | 25.63 |
| Service sector employment (%) | 72.07 | 76.76 | 82.86 | -0.36 | -1.49 - 0.21 | 41.02 |
| Agricultural sector employment (%) | 73.83 | 75.34 | 79.3 | -0.46 | -1.42 - 0.36 | 44.63 |
| Financial globalization subindex | 34.62 | 71.53 | 97.17 | 0.15 | -0.31 - 0.45 | 14.5 |
| Informational globalization subindex | 53.37 | 62.7 | 71.44 | 0.22 | -0.61 - 0.78 | 5.18 |
| Gender Inequality Index | 24.02 | 45.12 | 66.16 | 0.08 | -0.37 - 0.51 | 9.13 |
| Human Development Index | 23.88 | 36.82 | 49.85 | 0 | -0.69 - 0.74 | 4.54 |
| GDP per capita | 14.6 | 32.62 | 59.08 | -0.04 | -0.53 - 0.33 | 0.39 |

*Note.* All models included random intercepts across country and time interval, and controlled for between- and within-country differences in the years between WVS waves as well as data quality. The gamma symbol (γ) denotes the standardized between-country effects.

a The percentage of effect sizes above 0 for predictors with positive median effects, and the percentage below 0 for predictors with negative median effects.

b Complete SCA results, combining data with the wave interval 1 observations both included and excluded.

c SCA results with the wave interval 1 observations included.

d SCA results with the wave interval 1 observations excluded.

**References**

1. Muthukrishna, M. *et al.* Beyond western, educated, industrial, rich, and democratic (WEIRD) psychology: Measuring and mapping scales of cultural and psychological distance. *Psychol. Sci.* **31**, 678–701 (2020).

2. Koller, M. robustlmm: an R package for robust estimation of linear mixed-effects models. *J. Stat. Softw.* **75**, 1–24 (2016).

3. Simonsohn, U., Simmons, J. P. & Nelson, L. D. Specification curve analysis. *Nat. Hum. Behav.* **4**, 1208–1214 (2020).

4. Johnstone, I. M. & Titterington, D. M. Statistical challenges of high-dimensional data. *Philos. Trans. R. Soc. Math. Phys. Eng. Sci.* **367**, 4237–4253 (2009).

5. Elleman, L. G., Condon, D. M., Holtzman, N. S., Allen, V. R. & Revelle, W. Smaller is better: Associations between personality and demographics are improved by examining narrower traits and regions. *Collabra Psychol.* **6**, (2020).

6. Peters, H. *et al.* Regional personality differences predict variation in early COVID-19 infections and mobility patterns indicative of social distancing. *J. Pers. Soc. Psychol.* **124**, 848 (2023).

7. Rentfrow, P. J., Gosling, S. D. & Potter, J. A theory of the emergence, persistence, and expression of geographic variation in psychological characteristics. *Perspect. Psychol. Sci.* **3**, 339–369 (2008).
